# Supplementary material for: Psychological stress exposure to aged mice causes abnormal feeding patterns with changes in the bout number
Source: publisher site journal article supplement (doi:10.18632/aging.101320), 2017-11-09
Supplement: Supplementary file [file aging-v9i11-101320-supplementary-material-SD1.pdf]

## SUPPLEMENTAL MATERIAL

**Supplementary Table S1.** Parameters of feeding pattern in microstructure study.

| Parameters                      | Definition                                                    |
|---------------------------------|---------------------------------------------------------------|
| Meal amount (g)                 | Food intake for analysis duration                             |
| Meal number                     | Number of meal for analysis duration                          |
| Meal size (g)                   | Meal amount / Meal number                                     |
| Bout number                     | Number of bout for analysis duration                          |
| Bout size (g)                   | Meal amount / Bout number                                     |
| 1 <sup>st</sup> meal amount (g) | Food intake at the 1 <sup>st</sup> Meal                       |
| 1 <sup>st</sup> meal time (s)   | Time taken for the 1 <sup>st</sup> Meal                       |
| Latency (s)                     | Time from measurement start to the 1 <sup>st</sup> Meal start |
| Meal time (s)                   | Total time taken for meal                                     |
| Meal duration (s)               | Meal time / Meal number                                       |

**Supplementary Table S2.** Comparison of manual measurement of meal amount based on previously reported method with automatic measurement of meal amount by using Feedam-system in two types of psychological stressed mice.

| Methods            | Basal         | Novelty stress | P value   | Decrease rate |
|--------------------|---------------|----------------|-----------|---------------|
| Manual measurement | 3.02 ± 0.06 g | 2.18 ± 0.20 g  | P < 0.001 | 27.8 ± 6.5 %  |
| Feedam measurement | 3.05 ± 0.10 g | 1.99 ± 0.18 g  | P < 0.001 | 34.8 ± 6.0 %  |

| Methods            | Young-Control | Young-WAS     | Aged-Control  | Aged-WAS      |
|--------------------|---------------|---------------|---------------|---------------|
| Manual measurement | 2.83 ± 0.17 g | 2.84 ± 0.11 g | 3.35 ± 0.23 g | 4.03 ± 0.30 g |
| Feedam measurement | 2.62 ± 0.15 g | 2.68 ± 0.14 g | 2.97 ± 0.26 g | 3.31 ± 0.28 g |

Meal amount by manual measurement and meal amount by Feedam-system measurement for 24 h were compared. Basal/Novelty stress was performed with young mice (n = 16). Control/water avoidance stress (WAS) was performed with young (n = 8) and aged mice (n = 7). Data are presented as mean ± SEM.

(A)

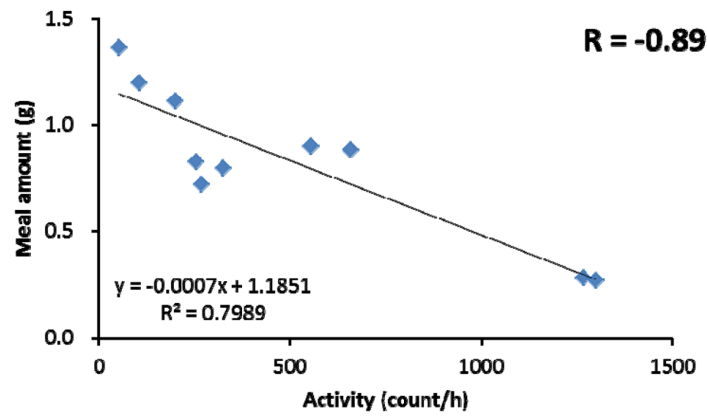

(B)

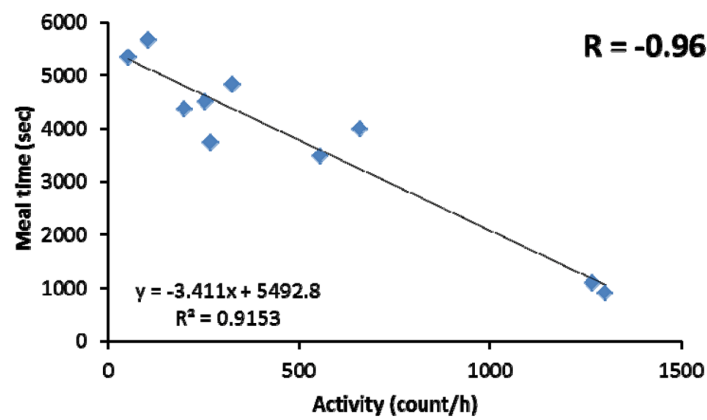

**Supplementary Figure S1. Correlation between locomotor activity and meal amount/meal time.** We analyzed the correlation between locomotor activity and meal amount/meal time in 0–3 h on dark phase. The average value of each group (fed, fast, young-basal, young-novel, aged-basal, aged-novel, young-control, young-WAS, aged-control, aged-WAS) is shown. (A) Correlation diagram between locomotor activity and meal amount.  $P < 0.001$  by Pearson correlation test. (B) Correlation diagram between locomotor activity and meal time.  $P < 0.001$  by Pearson correlation test.

(A)

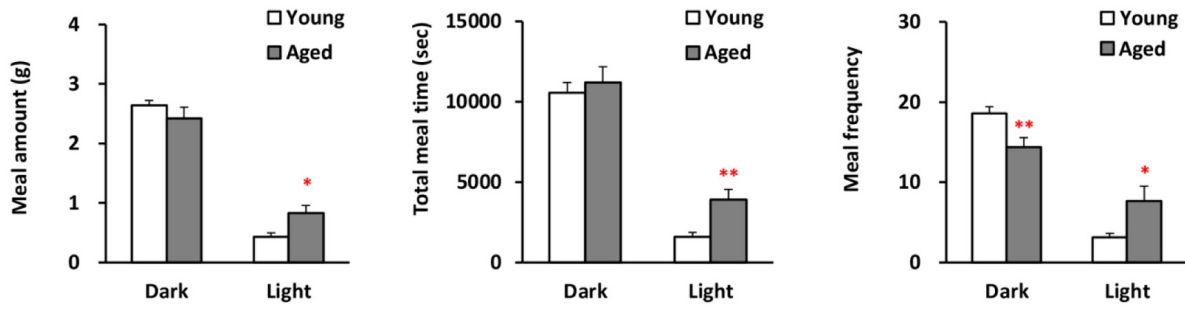

(B)

Ratio of dark phase-locomotor activity

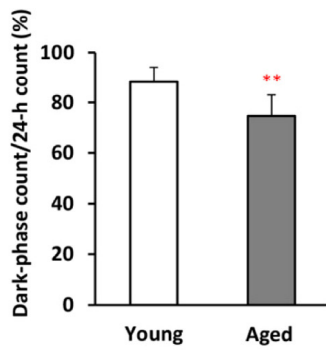

**Supplementary Figure S2. Meal parameters in the dark/light phase and ratio of locomotor activity in the dark phase in young and aged mice.** (A) Meal amount, Total meal time, and Meal frequency. (B) Ratio of locomotor activity in the dark phase. \*, \*\*,  $P < 0.05, 0.01$  vs. young mice,  $n = 14-16$ .

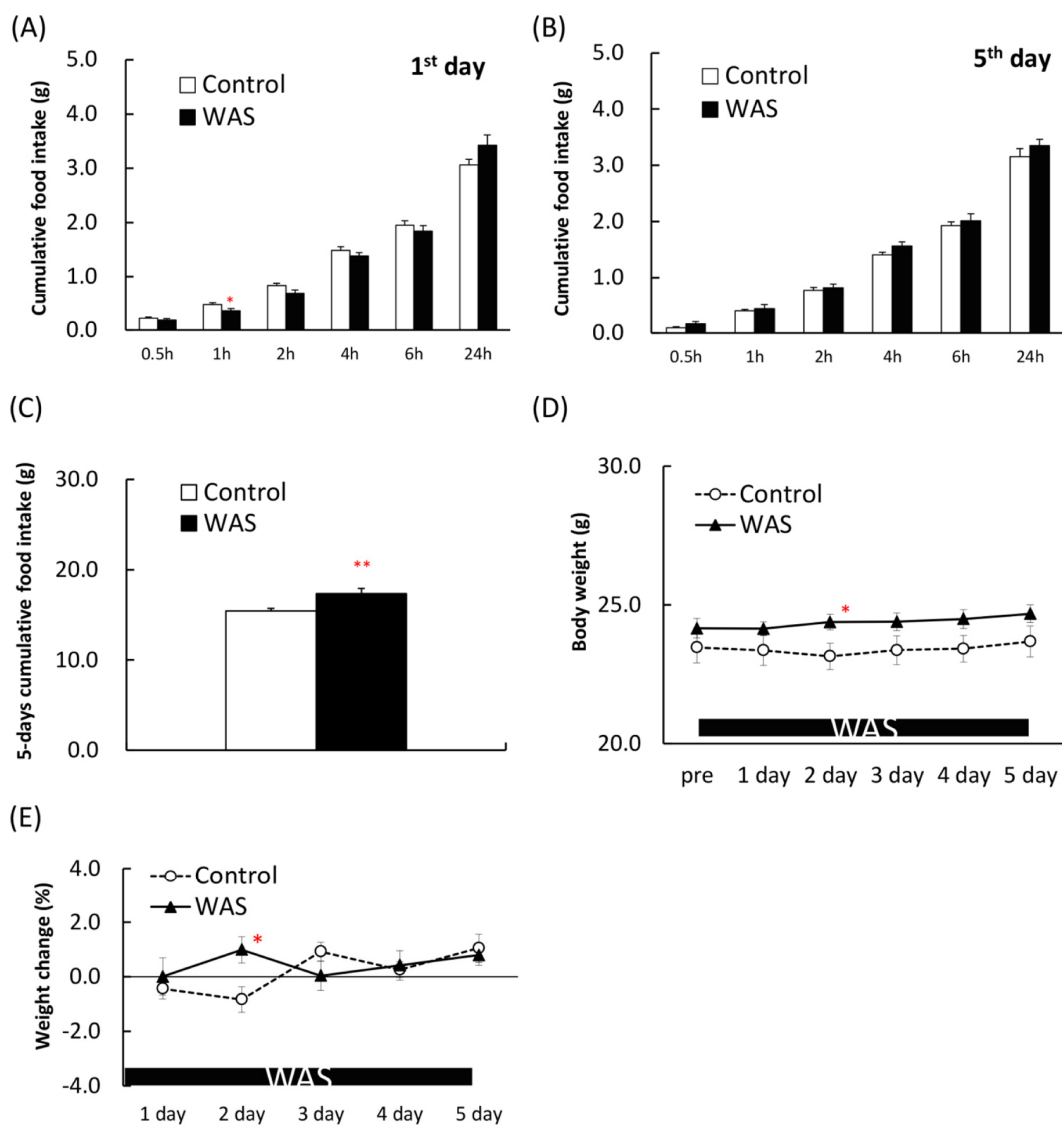

**Supplementary Figure S3. Changes in food intake and body weight in young mice after water avoidance stress exposure (for consecutive 5-days) by manual measurement.** (A) Cumulative food intake on the WAS-1st day, (B) Cumulative food intake on the WAS-5th day, (C) 5-days cumulative food intake, (D) Body weight changes, (E) Body weight gain (%). \*, \*\*,  $P < 0.05, 0.01$  vs. control,  $n = 10$ . Water avoidance stress: WAS.

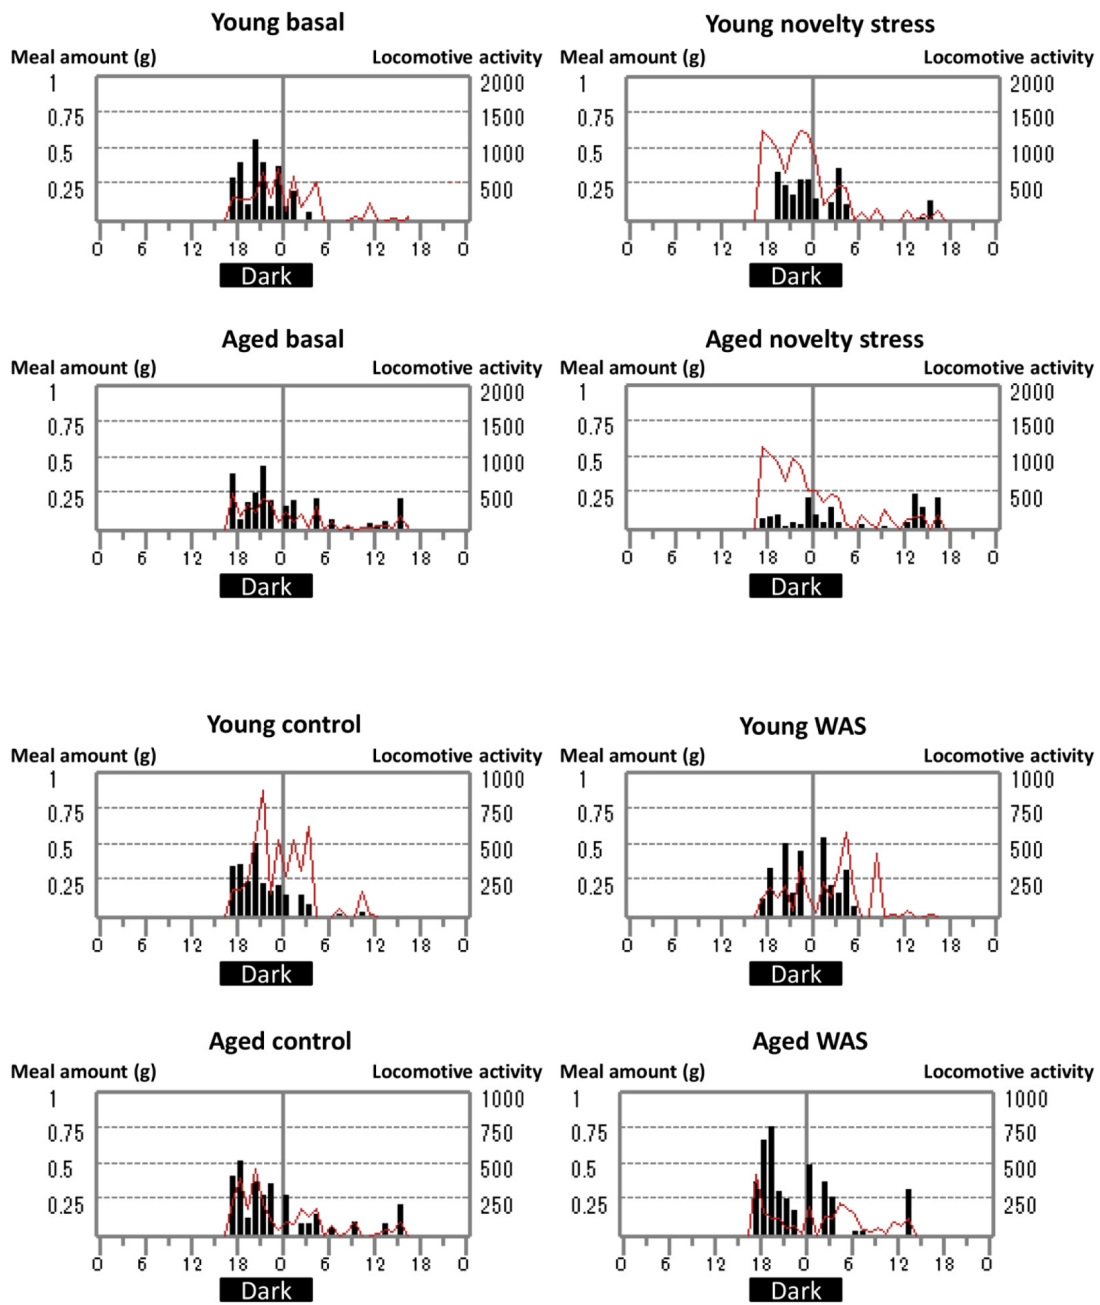

Supplementary Figure S4. Typical meal amount and voluntary movement changes detected by the Feedam system.

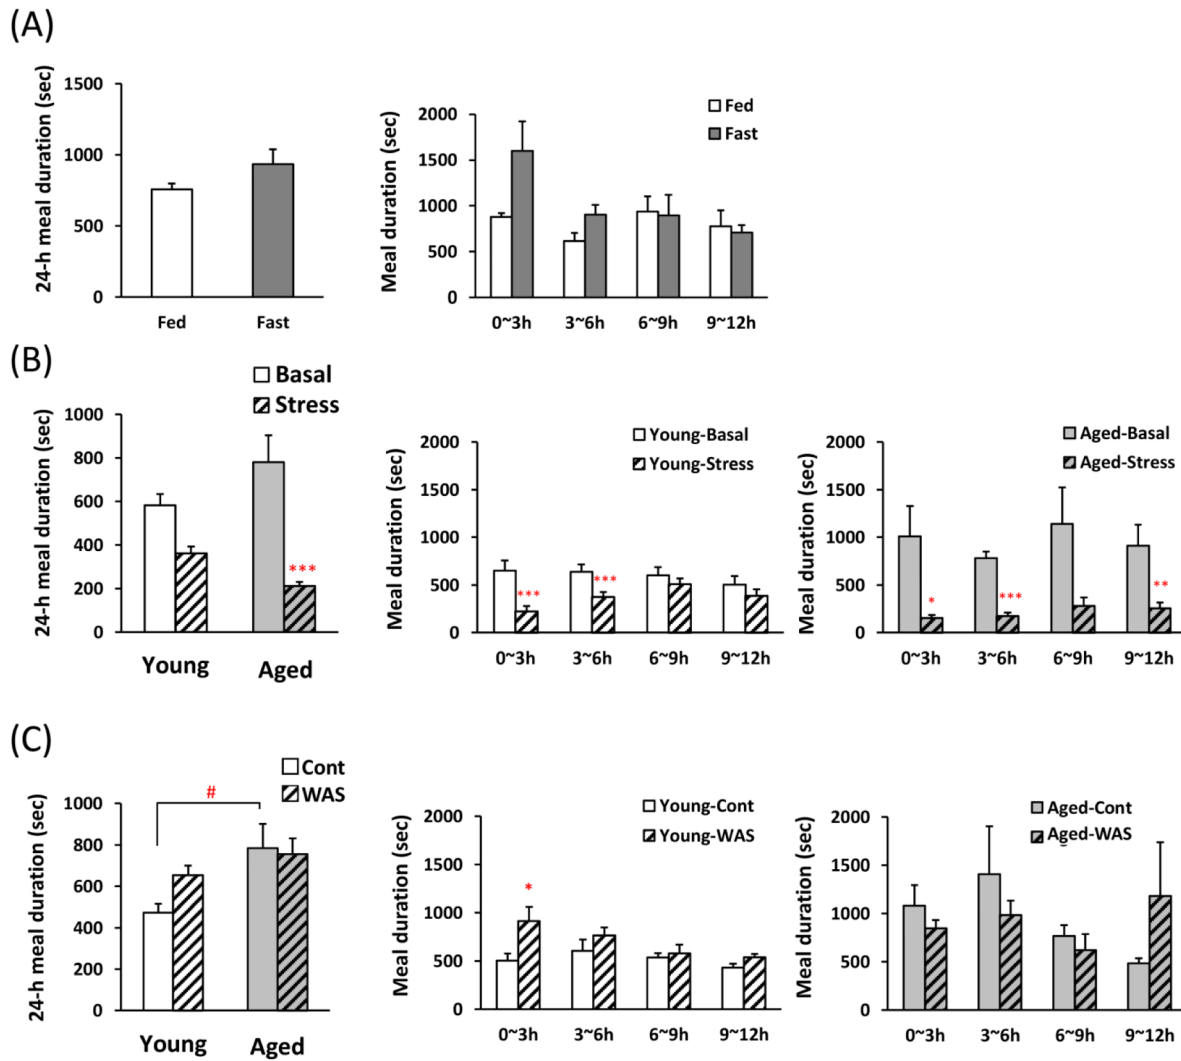

**Supplementary Figure S5. Changes in meal duration in young and aged mice after fasting or exposure to novelty stress/water avoidance stress.** (A) left: the 24-h meal duration, right: meal duration per 3 h on dark phase after 24-h fasting in young mice, (B) left: the 24-h meal duration, middle and right: meal duration per 3 h on dark phase in young and aged mice after novelty stress, (C) left: the 24-h meal duration, middle and right: meal duration per 3 h on dark phase in young and aged mice after water avoidance stress (WAS). \*, \*\*, \*\*\*;  $P < 0.05$ , 0.01, 0.001 vs. age-matched basal/control mice, #;  $P < 0.05$  between young and aged mice,  $n = 8, 14-16$ , or  $7-8$ .
